# Supplementary material for: The effectiveness of interventions in supporting self-management of informal caregivers of people with dementia; a systematic meta review
Source: Springer Nature journal article supplement (doi:10.1186/s12877-015-0145-6), 2015-11-11
Supplement: MOESM4 [file 9738822]

#### Additional file 4. Reason for exclusion of the excluded studies

| Study                | Reason for exclusion                              |
|----------------------|---------------------------------------------------|
| Annerstedt 2011      | Excluded based on criteria 'type of participant'  |
| Anonymous 2013       | Excluded based on criteria 'type of study'        |
| Arbesman 2011        | Excluded based on criteria 'type of study'        |
| Archer 2014          | Excluded based on criteria 'type of study'        |
| Aung 2010            | Excluded based on criteria 'type of study'        |
| Aung 2012            | Excluded based on criteria 'type of study'        |
| Ayalon 2006          | Excluded based on criteria 'type of intervention' |
| Bahar-Fuchs 2013     | Excluded based on criteria 'type of intervention' |
| Baldwin 2010         | Excluded based on criteria 'type of study'        |
| Bharucha 2009        | Excluded based on criteria 'type of intervention' |
| Biem 2003            | Excluded based on criteria 'type of intervention' |
| Brodsky 2012         | Excluded based on criteria 'type of intervention' |
| Brody 2013           | Excluded based on criteria 'type of participant'  |
| Buettner 2010        | Excluded based on criteria 'type of intervention' |
| Caddell 2011         | Excluded based on criteria 'type of intervention' |
| Campbell 2012        | Excluded based on criteria 'type of intervention' |
| Carrión 2013         | Excluded based on criteria 'type of intervention' |
| Carswell 2009        | Excluded based on criteria 'type of intervention' |
| Cepoiu-Martin 2012   | Excluded based on criteria 'type of study'        |
| Chatterton 2010      | Excluded based on criteria 'type of intervention' |
| Christoforetti 2007  | Excluded based on criteria 'type of study'        |
| Clare 2003           | Excluded based on criteria 'type of intervention' |
| Cohen-Mansfield 2001 | Excluded based on criteria 'type of study'        |
| Cooke 2001           | Excluded based on criteria 'type of intervention' |
| Coon 2009            | Excluded based on criteria 'type of study'        |
| Cooper 2007          | Excluded based on criteria 'type of intervention' |
| Courtenay 2010       | Excluded based on criteria 'type of participant'  |
| Croot 2009           | Excluded based on criteria 'type of study'        |
| Cummings 2009        | Excluded based on criteria 'type of study'        |
| Daly 1999            | Excluded based on criteria 'type of study'        |
| DePalma 2007         | Excluded based on criteria 'type of study'        |
| Doody 2001           | Excluded based on criteria 'type of intervention' |
| Drennan 2012         | Excluded based on criteria 'type of intervention' |
| Egan 2010            | Excluded based on criteria 'type of intervention' |
| Egan 2006.           | Excluded based on criteria 'type of study'        |
| Eggenberger 2013     | Excluded based on criteria 'type of study'        |
| Eggermont 2006       | Excluded based on criteria 'type of intervention' |
| Enmarker 2011        | Excluded based on criteria 'type of intervention' |
| Etters 2008          | Excluded based on criteria 'type of study'        |
| Eustice 2000         | Excluded based on criteria 'type of participant'  |
| Filan 2006           | Excluded based on criteria 'type of intervention' |

|                         |                                                   |
|-------------------------|---------------------------------------------------|
| Fischer-Terworth 2009   | Excluded based on criteria 'type of intervention' |
| Forbes 2008             | Excluded based on criteria 'type of intervention' |
| Forbes 2013             | Excluded based on criteria 'type of intervention' |
| Forbes 1998             | Excluded based on criteria 'type of intervention' |
| Gallagher 2011          | Excluded based on criteria 'type of study'        |
| Gillespie Lesley 2012   | Excluded based on criteria 'type of intervention' |
| Gitlin 2012             | Excluded based on criteria 'type of study'        |
| Gonzalez-Guillermo 2008 | Excluded based on criteria 'type of study'        |
| Hall 2012               | Excluded based on criteria 'type of intervention' |
| Hautzinger 2002         | Excluded based on criteria 'type of study'        |
| Herrmann 2007           | Excluded based on criteria 'type of intervention' |
| Herrmann 2008           | Excluded based on criteria 'type of intervention' |
| Herrmann 2001           | Excluded based on criteria 'type of intervention' |
| Hodgkinson 2007         | Excluded based on criteria 'type of intervention' |
| Hort 2010               | Excluded based on criteria 'type of study'        |
| Hulme 2010              | Excluded based on criteria 'type of study'        |
| Innes 2011              | Excluded based on criteria 'type of intervention' |
| Jones 2012              | Excluded based on criteria 'type of intervention' |
| Kiepe 2012              | Excluded based on criteria 'type of study'        |
| Kim 2012                | Excluded based on criteria 'type of intervention' |
| Koger 2000              | Unobtainable                                      |
| Kong 2009               | Excluded based on criteria 'type of intervention' |
| Konno 2013              | Excluded based on criteria 'type of intervention' |
| Kotronoulas 2013        | Excluded based on criteria 'type of intervention' |
| Kuske 2007              | Excluded based on criteria 'type of intervention' |
| Kverno. 2009            | Excluded based on criteria 'type of intervention' |
| Lawrence 2012           | Excluded based on criteria 'type of intervention' |
| LeClerc 1998            | Excluded based on criteria 'type of study'        |
| Livingston 2005         | Excluded based on criteria 'type of study'        |
| Lopez 2007              | Excluded based on criteria 'type of intervention' |
| Lorenz 2008             | Excluded based on criteria 'type of intervention' |
| Manckoundia 2008        | Excluded based on criteria 'type of study'        |
| Marcus 1992             | Excluded based on criteria 'type of study'        |
| McKeown 2006            | Excluded based on criteria 'type of intervention' |
| McLaren 2013            | Excluded based on criteria 'type of study'        |
| Moniz Cook 2012         | Excluded based on criteria 'type of intervention' |
| Napoles 2010            | Excluded based on criteria 'type of intervention' |
| Neal 2003               | Excluded based on criteria 'type of intervention' |
| Nguyen 2008             | Excluded based on criteria 'type of intervention' |
| Nijhof 2009             | Excluded based on criteria 'type of study'        |
| O'Connor 2011           | Excluded based on criteria 'type of study'        |
| O'Connor 2009           | Excluded based on criteria 'type of participant'  |
| Olazaran 2010           | Excluded based on criteria 'type of intervention' |
| O'Neil 2011             | Excluded based on criteria 'type of intervention' |
| Opie 1999               | Excluded based on criteria 'type of intervention' |

|                   |                                                      |
|-------------------|------------------------------------------------------|
| Orgeta 2014       | Excluded based on criteria 'type of intervention'    |
| Orgeta 2014       | Excluded based on criteria 'type of outcome measure' |
| Padilla 2011      | Excluded based on criteria 'type of intervention'    |
| Paolino 2013      | Excluded based on criteria 'type of study'           |
| Parks 2006        | Excluded based on criteria 'type of study'           |
| Penrose 2005      | Excluded based on criteria 'type of intervention'    |
| Perkins 2008      | Excluded based on criteria 'type of intervention'    |
| Pimouguet 2010    | Excluded based on criteria 'type of intervention'    |
| Powell 2008       | Excluded based on criteria 'type of intervention'    |
| Preschl 2011      | Excluded based on criteria 'type of participant'     |
| Price 2000        | Excluded based on criteria 'type of intervention'    |
| Rae 2011          | Excluded based on criteria 'type of study'           |
| Rice 2001         | Excluded based on criteria 'type of study'           |
| Rigaud 2011       | Excluded based on criteria 'type of study'           |
| Roberts 2000      | Excluded based on criteria 'type of intervention'    |
| Robinson 2006     | Excluded based on criteria 'type of outcome measure' |
| Robinson 2007     | Excluded based on criteria 'type of intervention'    |
| Santos 2011       | Excluded based on criteria 'type of intervention'    |
| Schneider 1993    | Excluded based on criteria 'type of study'           |
| Schoenmakers 2010 | Excluded based on criteria 'type of intervention'    |
| Schulz 2002       | Excluded based on criteria 'type of intervention'    |
| Seitz 2012        | Excluded based on criteria 'type of intervention'    |
| Selwood 2007      | Excluded based on criteria 'type of study'           |
| Sorbi 2012        | Excluded based on criteria 'type of study'           |
| Souder 2003       | Excluded based on criteria 'type of study'           |
| Spijker 2008      | Excluded based on criteria 'type of outcome measure' |
| Spira 2006        | Excluded based on criteria 'type of study'           |
| Taft 1995         | Excluded based on criteria 'type of intervention'    |
| Tam-Tham 2013     | Excluded based on criteria 'type of intervention'    |
| Teri 2005         | Excluded based on criteria 'type of intervention'    |
| Thirymoorthy 2013 | Unobtainable                                         |
| Topo 2009         | Excluded based on criteria 'type of study'           |
| Torti 2004        | Excluded based on criteria 'type of study'           |
| Toseland 1989     | Excluded based on criteria 'type of participant'     |
| Ueda 2013         | Excluded based on criteria 'type of intervention'    |
| van Ginneken 2013 | Excluded based on criteria 'type of intervention'    |
| Vazquez 2009      | Excluded based on criteria 'type of intervention'    |
| Verkaik 2005      | Excluded based on criteria 'type of intervention'    |
| Wall 2010         | Excluded based on criteria 'type of intervention'    |
| Warner 2008       | Unobtainable                                         |
| Woods 2012        | Excluded based on criteria 'type of intervention'    |
| Woodward 2013     | Excluded based on criteria 'type of study'           |
| Yu 2009           | Excluded based on criteria 'type of intervention'    |

|               |                                                   |
|---------------|---------------------------------------------------|
| Zetteler 2008 | Excluded based on criteria 'type of intervention' |
|---------------|---------------------------------------------------|
