# Supplementary material for: The effectiveness of interventions in supporting self-management of informal caregivers of people with dementia; a systematic meta review
Source: Springer Nature journal article supplement (doi:10.1186/s12877-015-0145-6), 2015-11-11
Supplement: MOESM6 [file 9738822]

## Additional file 6. Outcome and effects of reviews included

| Outcome and effects of reviews included |                                                                                                                                                                                                                                                                                                                            |                                                                                                                                                                            |                                                                                                                                                                                                                                                                                                                                                                                                                                                                                                                                                                                                                                                                                                                                                                                                                                                                                  |                                                                                                                                                                                                                                                                                                                                                                                                                                                                                                                                                                                                                                                                                                                                                                                                                                 |                                                                                                                                                                                                                                 |
|-----------------------------------------|----------------------------------------------------------------------------------------------------------------------------------------------------------------------------------------------------------------------------------------------------------------------------------------------------------------------------|----------------------------------------------------------------------------------------------------------------------------------------------------------------------------|----------------------------------------------------------------------------------------------------------------------------------------------------------------------------------------------------------------------------------------------------------------------------------------------------------------------------------------------------------------------------------------------------------------------------------------------------------------------------------------------------------------------------------------------------------------------------------------------------------------------------------------------------------------------------------------------------------------------------------------------------------------------------------------------------------------------------------------------------------------------------------|---------------------------------------------------------------------------------------------------------------------------------------------------------------------------------------------------------------------------------------------------------------------------------------------------------------------------------------------------------------------------------------------------------------------------------------------------------------------------------------------------------------------------------------------------------------------------------------------------------------------------------------------------------------------------------------------------------------------------------------------------------------------------------------------------------------------------------|---------------------------------------------------------------------------------------------------------------------------------------------------------------------------------------------------------------------------------|
| Reference                               | Type of self-management support interventions                                                                                                                                                                                                                                                                              | Outcome variables of reviews included                                                                                                                                      | Results of intervention as reported in review                                                                                                                                                                                                                                                                                                                                                                                                                                                                                                                                                                                                                                                                                                                                                                                                                                    | Participant and intervention characteristics                                                                                                                                                                                                                                                                                                                                                                                                                                                                                                                                                                                                                                                                                                                                                                                    | Conclusion of the authors of included reviews                                                                                                                                                                                   |
| <b>Boots et al. (2013)</b>              | Internet-based interventions including:<br>– website with information and support<br>– website with additional caregiving strategies<br>– website combined with telephone support<br>– website with additional e-mail support<br>– website with a combination of individual work and exchange with other caregivers online | Various e.g.:<br>– self-efficacy<br>– stress/burden<br>– depressive symptoms<br>– coping<br>– social contact/ support<br>– knowledge<br>– (utilization of) health services | – (small) significant improvement of caregivers' well-being in measurement of depression, sense of competence, decision-making confidence, self-efficacy, and burden. However caregiver burden did not decrease significantly in all studies. Significant differences were found in caregiver burden between non-users and frequent users of the program. Increased intention to seek support was reported, as well as caregiver gain and self-control whereas caregiver stress and strain decreased<br>– no significant effects between groups or within the treatment group on quality of life or coping skills<br>– stress management techniques among caregivers and social isolation and health status did not improve. One study reported improvements in the control group: anxiety and depression decreased significantly, and well-being and quality of life increased. | No effects for participant and intervention characteristics were reported based on an analysis                                                                                                                                                                                                                                                                                                                                                                                                                                                                                                                                                                                                                                                                                                                                  | Internet interventions for informal dementia caregivers may improve caregiver well-being                                                                                                                                        |
| <b>Chien et al. (2011)</b>              | Caregiver support group interventions including:<br>– mutual support group<br>– psychoeducational group<br>– educational group                                                                                                                                                                                             | – mental health<br>– depression<br>– burden<br>– social outcome                                                                                                            | – caregivers' mental health significantly improved ( $g = -0.44$ [95% CI = -0.73, -0.15] $p < 0.001$ )<br>– depression was significantly reduced in caregivers ( $g = -0.40$ [95% CI = -0.72, -0.08] $p < 0.001$ )<br>– support group interventions effectively relieved burden for caregivers ( $g = -0.23$ [95% CI = -0.33, -0.13] $p = 0.286$ )<br>– social outcomes significantly improved ( $g = 0.40$ [95% CI = 0.09, 0.71] $p < 0.001$ )                                                                                                                                                                                                                                                                                                                                                                                                                                  | – Intervention characteristics: use of theoretical models, length of group sessions and total hours impacted significantly on psychological well being and depression. The following factors were associated with a more prominent and larger effect size: psycho educational groups, use of theoretical models, group size of 6-10 people, length of group sessions $\geq 8$ weeks and total hours $\geq 16$ and follow up. For burden: educational and training group, use of theoretical models, group size of 6-10 people, length of group sessions $\geq 8$ weeks and total hours $\geq 16$ and follow up.<br><br>– Participant characteristics (female participants, younger age, severity of dementia) in between-groups comparison on the effect sizes of psychological well-being, depression and in some cases burden | Support groups are significantly effective for caregivers of patients with dementia, while the effect size varies with different outcome variables, including psychological well-being, depression, burden, and social outcomes |

|                                      |                                                                                                                                                                                                                                                                                                       |                                                                                                                                                                                        |                                                                                                                                                                                                                                                                                                                                                                                                                                                                                                                                                                                                                                                                                                                                                                                                                                                                                                                                                                                                                                                                                                                                                                                                                                                                                                                                                                                                                                                                                                                                                                                                                                                                                                                                                                                                                                                                  |                                                                                                       |                                                                                                                                                                                                                                                                                                                                                           |
|--------------------------------------|-------------------------------------------------------------------------------------------------------------------------------------------------------------------------------------------------------------------------------------------------------------------------------------------------------|----------------------------------------------------------------------------------------------------------------------------------------------------------------------------------------|------------------------------------------------------------------------------------------------------------------------------------------------------------------------------------------------------------------------------------------------------------------------------------------------------------------------------------------------------------------------------------------------------------------------------------------------------------------------------------------------------------------------------------------------------------------------------------------------------------------------------------------------------------------------------------------------------------------------------------------------------------------------------------------------------------------------------------------------------------------------------------------------------------------------------------------------------------------------------------------------------------------------------------------------------------------------------------------------------------------------------------------------------------------------------------------------------------------------------------------------------------------------------------------------------------------------------------------------------------------------------------------------------------------------------------------------------------------------------------------------------------------------------------------------------------------------------------------------------------------------------------------------------------------------------------------------------------------------------------------------------------------------------------------------------------------------------------------------------------------|-------------------------------------------------------------------------------------------------------|-----------------------------------------------------------------------------------------------------------------------------------------------------------------------------------------------------------------------------------------------------------------------------------------------------------------------------------------------------------|
| <p><b>Mantovan et al. (2010)</b></p> | <ul style="list-style-type: none"> <li>- psycho-educational interventions</li> <li>- psychotherapeutic interventions</li> <li>- support interventions (individually or in groups)</li> <li>- case and care management</li> <li>- multicomponent interventions</li> <li>- training programs</li> </ul> | <p>Various</p>                                                                                                                                                                         | <ul style="list-style-type: none"> <li>- psycho-educational intervention: 1 study reported improvements in competence, coping and total burden. 1 underlying review (Thompson) reported that technology-based psycho educational interventions have no effect on depression. Group based interventions were found to have a positive effect on depression. Individual based interventions were found to have no effect on depression and self-efficacy. 1 underlying review (Pinquart) found significant effects for burden, depression, wellbeing and ability and knowledge</li> <li>- psychotherapeutic interventions (cognitive-behavioral) lead to a clear improvement of depression, while this showed inconsistent results for other interventions.</li> <li>- support interventions: 1 underlying review reported that none of their included studies showed effect on anxiety. 1 underlying study reported a reduction in depression. Another underlying study found no effects on burden and depression.</li> <li>- counseling / case management: 1 underlying review (Pinquart) reported a reduction of burden. 1 underlying study reported increased coping and a determination of coping.</li> <li>- multi-component: effects of underlying studies report significant effects in depression, burden and psychological health. In one underlying review (Pinquart) no effect was found for burden, depression, subjective wellbeing and ability/knowledge.</li> <li>- training program: effects of underlying studies reported mixed results on effects on the caregiver. 1 underlying study reported a reduction in burden. One underlying review (Pinquart) reported no effects on the caregiver. Coping, mood and competence were also reported to be improved. A significant improvement of competence was only found after 6 months.</li> </ul> | <p>No effects for participant and intervention characteristics were reported based on an analysis</p> | <p>The presentation of the results shows that psycho-educational, relieving, supportive, psychotherapeutic and multi-component interventions offered as well as counseling and case/care management among caring family members have significant effects on parameters such as burdens, level of depression, subjective well-being, skills/knowledge.</p> |
| <p><b>Marim et al. (2013)</b></p>    | <ul style="list-style-type: none"> <li>- (psycho) educational programs</li> </ul>                                                                                                                                                                                                                     | <ul style="list-style-type: none"> <li>- caregiver burden</li> </ul>                                                                                                                   | <ul style="list-style-type: none"> <li>- decreased caregiver burden (Articles that used intention to treat (MD -1.10 [95%CI-2.25, 0.05] p=0.06). Articles without intention to treat (MD:-4.46 [95%CI-15.54, 6.62] p=0.43). After excluding 3 studies (to reduce heterogeneity): MD -1.62 [95%CI -2.16, -1.08])</li> </ul>                                                                                                                                                                                                                                                                                                                                                                                                                                                                                                                                                                                                                                                                                                                                                                                                                                                                                                                                                                                                                                                                                                                                                                                                                                                                                                                                                                                                                                                                                                                                       | <p>No effects for participant and intervention characteristics were reported based on an analysis</p> | <p>The evidence obtained in this study suggests that educational and support programs have a positive impact on the reduction of caregiver burden when compared to standard care</p>                                                                                                                                                                      |
| <p><b>Parker et al. (2008)</b></p>   | <ul style="list-style-type: none"> <li>- psychoeducational interventions</li> <li>- support interventions</li> <li>- multi-component interventions</li> </ul>                                                                                                                                         | <p>Various including:</p> <ul style="list-style-type: none"> <li>- depression</li> <li>- health</li> <li>- subjective well-being</li> <li>- self-efficacy</li> <li>- burden</li> </ul> | <ul style="list-style-type: none"> <li>- psycho-educational interventions: statistically significant results for depression (WMD -1.93 [95%CI -3.79, -0.07] p=0.04) and subjective well-being (SMD -0.16 [95%CI -0.32, 0.00] p=0.04) but not for health (SMD 0.05 [95%CI -0.38, 0.48]), self-efficacy (SMD 0.30 [95%CI -0.04, 0.65]) and burden (SMD 0.02 [95%CI -0.37, 0.42])</li> <li>- support interventions (2 studies out of 7) report significant effects on caregiver burden (SMD -0.41, [95% CI -0.80, -0.02], p=0.04). 5 studies did not report significant findings in their interventions</li> <li>- multi-component: Mixed results were found in the underlying studies and reviews across a variety of outcome measures.</li> </ul>                                                                                                                                                                                                                                                                                                                                                                                                                                                                                                                                                                                                                                                                                                                                                                                                                                                                                                                                                                                                                                                                                                                 | <p>No effects for participant and intervention characteristics were reported based on an analysis</p> | <p>From this review there is evidence to suggest that well designed psycho-educational or multi-component interventions may assist caregivers of people with dementia who live in the community. More studies are needed to provide evidence of the effect of support interventions</p>                                                                   |

|                                              |                                                                                                                                                                                                                                                                                                                                                                            |                                                                                                                                                                    |                                                                                                                                                                                                                                                                                                                                                                                                                                                                                                                                                                                                                                                                                                                                                                                                                                                                                                                                                                                                                                                                                                                                                                                                                                                                                                                                                                                                                                                                                                                                                                                                                                                                                                                                                                                                                                                                                                                                                                                                                                                                                                                                                                             |                                                                                                                                                                                                                                                                  |                                                                                                                                                                                                                                                                                  |
|----------------------------------------------|----------------------------------------------------------------------------------------------------------------------------------------------------------------------------------------------------------------------------------------------------------------------------------------------------------------------------------------------------------------------------|--------------------------------------------------------------------------------------------------------------------------------------------------------------------|-----------------------------------------------------------------------------------------------------------------------------------------------------------------------------------------------------------------------------------------------------------------------------------------------------------------------------------------------------------------------------------------------------------------------------------------------------------------------------------------------------------------------------------------------------------------------------------------------------------------------------------------------------------------------------------------------------------------------------------------------------------------------------------------------------------------------------------------------------------------------------------------------------------------------------------------------------------------------------------------------------------------------------------------------------------------------------------------------------------------------------------------------------------------------------------------------------------------------------------------------------------------------------------------------------------------------------------------------------------------------------------------------------------------------------------------------------------------------------------------------------------------------------------------------------------------------------------------------------------------------------------------------------------------------------------------------------------------------------------------------------------------------------------------------------------------------------------------------------------------------------------------------------------------------------------------------------------------------------------------------------------------------------------------------------------------------------------------------------------------------------------------------------------------------------|------------------------------------------------------------------------------------------------------------------------------------------------------------------------------------------------------------------------------------------------------------------|----------------------------------------------------------------------------------------------------------------------------------------------------------------------------------------------------------------------------------------------------------------------------------|
| <p><b>Peacock &amp; Forbes (2003)</b></p>    | <ul style="list-style-type: none"> <li>- case-management interventions</li> <li>- education interventions</li> <li>- psychotherapy interventions</li> <li>- computer-networking interventions</li> </ul>                                                                                                                                                                   | <ul style="list-style-type: none"> <li>- caregiver depression</li> <li>- caregiver strain</li> <li>- caregiver stress</li> <li>- use of formal services</li> </ul> | <ul style="list-style-type: none"> <li>- case management interventions did not impact on levels of strain or depression for caregivers.</li> <li>- education interventions are insufficient to improve overall caregiver psychological well-being, such as decreasing strain and depression.</li> <li>- psychotherapy: only outcomes on the person with dementia were given</li> <li>- computer networking intervention: a significant increase in decision-making confidence; no significant differences between the groups were found in relation to decision-making skills, social isolation, or use of health services</li> </ul>                                                                                                                                                                                                                                                                                                                                                                                                                                                                                                                                                                                                                                                                                                                                                                                                                                                                                                                                                                                                                                                                                                                                                                                                                                                                                                                                                                                                                                                                                                                                       | <p>No effects for participant and intervention characteristics were reported based on an analysis</p>                                                                                                                                                            | <p>This systematic review reveals few significant effects for caregiver interventions, although non-significant findings were more common.</p>                                                                                                                                   |
| <p><b>Pinquart &amp; Sörensen (2006)</b></p> | <p>Various interventions included namely:</p> <ul style="list-style-type: none"> <li>- psycho-educational interventions</li> <li>- cognitive behavioral therapy (CBT)</li> <li>- counseling/case management</li> <li>- general support</li> <li>- training of the care receiver</li> <li>- multi-component interventions</li> <li>- miscellaneous interventions</li> </ul> | <ul style="list-style-type: none"> <li>- burden</li> <li>- depression</li> <li>- subjective wellbeing</li> <li>- ability/knowledge</li> </ul>                      | <ul style="list-style-type: none"> <li>- psycho-educational interventions had significant effects on burden (-0.15 [95% CI -0.25,-0.04] t-2.76), depression (-0.27, [95% CI -0.41, -0.13], t-3.88), subjective wellbeing (0.24 [95% CI 0.04, 0.44] t2.35), and ability/knowledge (0.46, 95%CI 0.28, 0.64, t4.90)</li> <li>- cognitive-behavioral therapy had significant effects on burden (-0.36 [95% CI -0.73,-0.01] t-1.89), depression (-0.70 [95% CI -1.10, -0.30] t-3.45), No significant effects were found on subjective wellbeing (0.37 [95% CI -0.27, 1.01] t1.13) and ability/knowledge (1.12 [95%CI -0.23, 1.62] t1.62)</li> <li>- counseling/ case management had significant and moderately sized effects on burden (-0.50 [95% CI -0.86,-0.14], t-2.73). No significant effects were found on depression (-0.20 [95% CI -0.63, 0.23] t-0.92), subjective wellbeing (0.42 [95% CI -0.01, 0.85] t1.93) and ability/knowledge (0.43 [95%CI -0.01, 0.86] t1.94)</li> <li>- supportive interventions had significant effects on subjective wellbeing (based on 1 study, 2.03 [95% CI 1.36, 2.70] t5.95). No significant effects were found for effects on burden (0.01 [95% CI -0.33, 0.35] t0.07), depression (0.05 [95% CI -0.68, 0.78] t0.13) and ability/knowledge (0.29 [95%CI -0.03, 0.61] t1.77)</li> <li>- training of the care recipient had no significant effects on burden (-0.17 [95% CI -0.60, 0.27] t-0.76 ), depression (0.01 [95% CI -0.56, 0.58] t0.03), subjective wellbeing (0.42 [95% CI -0.18, 1.01] t1.36) and ability/knowledge (-0.12 [95%CI -0.78, 0.49] t-0.37)</li> <li>- multi-component interventions had no significant effects on burden (-0.03 [95% CI -0.11, 0.05] t-0.74), depression (-0.10 [95% CI -0.26, 0.06] t-1.19), subjective wellbeing (-0.13 [95% CI -0.68, 0.41] t-0.48,) and ability/knowledge (0.55 [95%CI -0.55, 1.55] t0.93,)</li> <li>- miscellaneous interventions: no significant effects on burden (-0.20 [95% CI -0.42, 0.02] t-1.76), depression (0.12 [95% CI -0.15, 0.38] t0.86), subjective wellbeing (0.37 [95% CI -0.09, 0.83] t1.58), ability/knowledge (0.35 [95%CI -0.13, 0.82] t0.82)</li> </ul> | <ul style="list-style-type: none"> <li>- longer interventions were more likely to improve depression</li> <li>- a higher percentage of women showed more improvements in depression and knowledge/abilities, less improvement in subjective wellbeing</li> </ul> | <p>Caregiver interventions have significant but small effects on reducing burden, depression, subjective wellbeing, ability/knowledge and care recipient symptoms. Psychoeducational interventions have the broadest effects, but only if they call for active participation</p> |

|                                      |                                                                                                                                                                                                                                                                                                                                                                                  |                                                                                                                                                          |                                                                                                                                                                                                                                                                                                                                                                                                                                                                                                                                                                                                                                                           |                                                                                                |                                                                                                                                                                                                                                                                                      |
|--------------------------------------|----------------------------------------------------------------------------------------------------------------------------------------------------------------------------------------------------------------------------------------------------------------------------------------------------------------------------------------------------------------------------------|----------------------------------------------------------------------------------------------------------------------------------------------------------|-----------------------------------------------------------------------------------------------------------------------------------------------------------------------------------------------------------------------------------------------------------------------------------------------------------------------------------------------------------------------------------------------------------------------------------------------------------------------------------------------------------------------------------------------------------------------------------------------------------------------------------------------------------|------------------------------------------------------------------------------------------------|--------------------------------------------------------------------------------------------------------------------------------------------------------------------------------------------------------------------------------------------------------------------------------------|
| <b>Thompson et al. (2007)</b>        | Information and support interventions including:<br>– technology-based interventions<br>– group-based interventions<br>– individual-based interventions                                                                                                                                                                                                                          | Various including e.g.:<br>– information<br>– perceived social support<br>– support satisfaction<br>– depression<br>– burden<br>– self-efficacy          | – technology-based interventions: no significant effects found on depression (WMD 0.62 [95%CI -1.98, 3.22] p=0.64)<br>– group-based interventions: psychoeducational interventions had significant effects on caregiver depression: (-0.71 [95% CI -0.95,-0.46] p<0.00001). No significant effects were found on burden (-2.15 [95% CI -5.97,1.66] p=0.27). Support intervention had no significant effects on burden (-0.40 [95% CI -5.69, 4.90] p=0.88)<br>– individual (psycho-educational) interventions: no significant effects were found on depression (-0.21 [95% CI -0.61, 0.20] p=0.32) and on self-efficacy (0.37 [95% CI -0.28, 1.02] p=0.26) | No effects for participant and intervention characteristics were reported based on an analysis | There is little evidence that interventions aimed at supporting and/or providing information to caregivers of people with dementia are uniformly effective                                                                                                                           |
| <b>Van 't Leven et al. (2013)</b>    | Most programs consist of multiple treatment components including:<br>– information<br>– psycho-education<br>– skills training<br>– coping strategies for the caregiver<br><br>Also self-management support interventions for persons with dementia were included viz:<br>– information, training for activities of daily life, walking or exercise, and environmental adaptation | – mood<br>– burden<br>– competence<br>– quality of life<br><br>(Also outcomes of persons with dementia were studied but not included in our meta-review) | – mood; 2 studies found significant positive effects, 1 study found a positive effect only on 18 months; 1 study a positive trend; 5 studies did not show statistically significant effects<br>– perceived burden and competence; 13 studies showed significant positive effects (not at all follow up points), 4 studies did not show statistically significant effects<br>– quality of life (n=10); 7 studies found significant positive effects, 3 studies did not show statistically significant effects                                                                                                                                              | No effects for participant and intervention characteristics were reported based on an analysis | Dyadic psychosocial programs are effective, but the outcomes for the person with dementia and caregiver vary                                                                                                                                                                         |
| <b>Vernooij-Dassen et al. (2011)</b> | Cognitive reframing interventions including e.g.:<br>– cognitive behavioral therapy<br>– skills building/training<br>– coping/behavior management                                                                                                                                                                                                                                | – anxiety<br>– depression<br>– stress<br>– carer burden<br>– coping or self-efficacy<br>– quality of life                                                | – change in anxiety (SMD -0.21 [95%CI -0.39, -0.04] p= 0.02), depression (SMD -0.66 [95%CI -1.27, -0.05] p= 0.03) depression (subgroup analysis)SMD -0.24 [95% CI 0.42, -0.07]) and stress/ distress related to caregiving (SMD -0.24 [95% CI -0.40, -0.07] test overall effect p=0.006) indicated a significant benefit from treatment<br>– no significant benefit from treatment was found on carer burden (SMD -0.14 [95%CI -0.32, 0.03], p=0.12), coping/ self-efficacy (SMD 0.64 [95% CI -0.17, 1.45] p=0.12) and RMBPC (SMD -0.21 [95%CI 0.45, 0.03] p=0.09)                                                                                        | No effects for participant and intervention characteristics were reported based on an analysis | Cognitive reframing for family carers of persons with dementia showed beneficial effects over usual care for psychological morbidity (anxiety, depression) and (dis)stress. No effects were found for coping or self-efficacy, carer burden and reaction to the relative's behavior. |
