# Supplementary material for: The effectiveness of interventions in supporting self-management of informal caregivers of people with dementia; a systematic meta review
Source: Springer Nature journal article supplement (doi:10.1186/s12877-015-0145-6), 2015-11-11
Supplement: MOESM7 [file 9738822]

### Additional file 7. Evidence for self-management support interventions reported by the included reviews on outcome

|                                       |                                          |                                           | Outcomes      |              |                   |               |               |                            |         |                    |                    |                 |                 |        |        |                     |  |
|---------------------------------------|------------------------------------------|-------------------------------------------|---------------|--------------|-------------------|---------------|---------------|----------------------------|---------|--------------------|--------------------|-----------------|-----------------|--------|--------|---------------------|--|
| Review                                | Intervention as described by the authors | Burden                                    | Depression    | Wellbeing    | Ability/knowledge | Coping skills | Self-efficacy | Decision Making confidence | Anxiety | Stress or distress | RMBPC <sup>1</sup> | Quality of life | Social outcomes | Mood   | Health | Sense of competence |  |
| Relationship with family              | Mantovan et al. (2010)                   | - Case and care management                | + (1)         |              |                   |               |               |                            |         |                    |                    |                 |                 |        |        |                     |  |
|                                       | Parker et al. (2008)                     | - Support interventions                   | + (2)*/ 0 (5) |              |                   |               |               |                            |         |                    |                    |                 |                 |        |        |                     |  |
|                                       | Peacock & Forbes (2003)                  | - Case-management interventions           |               | 0 (1)        |                   |               |               |                            |         |                    |                    |                 |                 |        |        |                     |  |
|                                       |                                          | - Psychotherapy                           |               |              |                   |               |               |                            |         |                    |                    |                 |                 |        |        |                     |  |
| Pinquart & Sorensen (2006)            | - Counseling/case management*            | + (4)                                     | 0 (3)         | 0 (3)        | 0 (3)             |               |               |                            |         |                    |                    |                 |                 |        |        |                     |  |
| Psychological wellbeing               | Chien et al. (2011)                      | - Caregiver support group interventions*  | 0 (24 ES)     | + (17 ES)    | + (19 ES)         |               |               |                            |         |                    |                    |                 |                 | + (13) |        |                     |  |
|                                       | Mantovan et al. (2010)                   | - Psychotherapeutic interventions         | + (2)/ 0 (1)  | + (3)        |                   |               |               |                            |         | 0 (2)              |                    |                 |                 |        |        |                     |  |
|                                       |                                          | - Support interventions                   | 0 (1)         | + (1)/ 0 (1) |                   |               |               |                            |         | 0 (1)              |                    |                 |                 |        |        |                     |  |
|                                       | Pinquart & Sorensen (2006)               | - Cognitive behavioral therapy*           | + (9)         | + (11)       | 0 (1)             | 0 (3)         |               |                            |         |                    |                    |                 |                 |        |        |                     |  |
|                                       |                                          | - Support*                                | 0 (4)         | 0 (2)        | + (1)             | 0 (3)         |               |                            |         |                    |                    |                 |                 |        |        |                     |  |
| Vernooij-Dassen et al. (2011)         | - Cognitive reframing interventions*     | 0 (4)                                     | + (6)         |              |                   |               | 0 (4)         | 0 (4)                      |         | + (4)              | + (4)              | 0 (3)           |                 |        |        |                     |  |
| Techniques to cope with memory change | Mantovan et al. (2010)                   | - Trainingsprogram                        | + (1)/ 0 (1)  | 0 (1)        | 0 (1)             | 0 (1)         | + (1)         |                            |         |                    |                    |                 |                 |        | + (1)  | + (1)               |  |
|                                       | Pinquart & Sorensen (2006)               | - Training of care recipient*             | 0 (6)         | 0 (4)        | 0 (3)             | 0 (2)         |               |                            |         |                    |                    |                 |                 |        |        |                     |  |
| Information                           | Boots et al. (2013)                      | - Internet-based supportive interventions | + (2)/ 0 (2)  | + (2)/ - (1) | - (1)             |               | 0 (1)         | + (4)                      | + (1)   | - (1)              | + (1)              |                 | 0 (1)/ - (1)    |        | 0 (1)  | + (1)               |  |
|                                       | Mantovan et al. (2010)                   | - Psychoeducation interventions           | + (3)         | + (1)/ 0 (1) | + (1)             | + (1)         | + (1)         | 0 (1)                      |         |                    |                    |                 |                 |        |        | + (1)               |  |

|                                                                                                                                                                                                                                                                                                                                                                                                                                                                                                                                       |                                                          |                                                                           |                            |                            |               |               |  |  |              |  |              |  |  |  |                            |  |  |                            |                             |  |
|---------------------------------------------------------------------------------------------------------------------------------------------------------------------------------------------------------------------------------------------------------------------------------------------------------------------------------------------------------------------------------------------------------------------------------------------------------------------------------------------------------------------------------------|----------------------------------------------------------|---------------------------------------------------------------------------|----------------------------|----------------------------|---------------|---------------|--|--|--------------|--|--------------|--|--|--|----------------------------|--|--|----------------------------|-----------------------------|--|
|                                                                                                                                                                                                                                                                                                                                                                                                                                                                                                                                       | Marim et al. (2013)                                      | - Educational programs (analysis of sensitivity)*                         | <b>+</b> (4)               |                            |               |               |  |  |              |  |              |  |  |  |                            |  |  |                            |                             |  |
|                                                                                                                                                                                                                                                                                                                                                                                                                                                                                                                                       | Parker et al. (2008)                                     | - Psycho-educational interventions*                                       | <b>0</b> (7)               | <b>+</b> (4)               | <b>+</b> (5)  |               |  |  | <b>0</b> (4) |  |              |  |  |  |                            |  |  |                            | <b>0</b> (3)                |  |
|                                                                                                                                                                                                                                                                                                                                                                                                                                                                                                                                       | Peacock & Forbes (2003)                                  | - Education interventions                                                 |                            | <b>0</b> (2)               |               |               |  |  |              |  |              |  |  |  |                            |  |  |                            |                             |  |
|                                                                                                                                                                                                                                                                                                                                                                                                                                                                                                                                       |                                                          | - Computer-networking intervention                                        |                            |                            |               |               |  |  |              |  | <b>+</b> (1) |  |  |  |                            |  |  |                            |                             |  |
|                                                                                                                                                                                                                                                                                                                                                                                                                                                                                                                                       | Pinquart & Sorensen (2006)                               | - Psychoeducation*                                                        | <b>+</b> (42)              | <b>+</b> (32)              | <b>+</b> (13) | <b>+</b> (34) |  |  |              |  |              |  |  |  |                            |  |  |                            |                             |  |
|                                                                                                                                                                                                                                                                                                                                                                                                                                                                                                                                       | Thompson et al. (2007)                                   | - information and support interventions (technology-based interventions)* |                            | <b>0</b> (3)               |               |               |  |  |              |  |              |  |  |  |                            |  |  |                            |                             |  |
|                                                                                                                                                                                                                                                                                                                                                                                                                                                                                                                                       |                                                          | - information and support interventions (group-based interventions)*      | <b>0</b> (3)               | <b>+</b> (5)               |               |               |  |  |              |  |              |  |  |  |                            |  |  |                            |                             |  |
|                                                                                                                                                                                                                                                                                                                                                                                                                                                                                                                                       |                                                          | - information and support interventions (individual-based interventions)* |                            |                            | <b>0</b> (7)  |               |  |  | <b>0</b> (2) |  |              |  |  |  |                            |  |  |                            |                             |  |
| <b>Multi-component</b>                                                                                                                                                                                                                                                                                                                                                                                                                                                                                                                | Mantovan et al. (2010)                                   | - Multimodale interventions                                               | <b>+</b> (1)/ <b>0</b> (1) | <b>+</b> (2)/ <b>0</b> (1) | <b>0</b> (1)  | <b>0</b> (1)  |  |  |              |  |              |  |  |  |                            |  |  |                            |                             |  |
|                                                                                                                                                                                                                                                                                                                                                                                                                                                                                                                                       | Parker et al. (2008)                                     | - Multi-component interventions                                           | <b>+/0</b> (14)            | <b>+/0</b> (14)            | <b>0</b> (1)  | <b>0</b> (1)  |  |  |              |  |              |  |  |  | <b>+</b> (1)               |  |  |                            |                             |  |
|                                                                                                                                                                                                                                                                                                                                                                                                                                                                                                                                       | Pinquart & Sorensen (2006)                               | - Multi-component interventions*                                          | <b>0</b> (10)              | <b>0</b> (8)               | <b>0</b> (2)  | <b>0</b> (2)  |  |  |              |  |              |  |  |  |                            |  |  |                            |                             |  |
|                                                                                                                                                                                                                                                                                                                                                                                                                                                                                                                                       |                                                          | - Miscellaneous interventions*                                            | <b>0</b> (11)              | <b>0</b> (6)               | <b>0</b> (1)  | <b>0</b> (1)  |  |  |              |  |              |  |  |  |                            |  |  |                            |                             |  |
| Van 't Leven et al. (2013)                                                                                                                                                                                                                                                                                                                                                                                                                                                                                                            | - Dyadic interventions with multiple treatment component | <b>+(13)/0</b> (4)                                                        |                            |                            |               |               |  |  |              |  |              |  |  |  | <b>+</b> (7)/ <b>0</b> (3) |  |  | <b>+</b> (3)/ <b>0</b> (6) | <b>+</b> (13)/ <b>0</b> (4) |  |
| <p><b>+</b> significant effect for the intervention on the outcome reported by the included review<br/> <b>-</b> significant reversed effect for the intervention on the outcome reported by the included review<br/> <b>0</b> no (significant) effect for the intervention on the outcome reported by the included review<br/> <b>( )</b> number of underlying studies</p> <p>*combined effect of the intervention on the outcome reported by the included review<br/> <sup>1</sup>Revised Memory and Behavior Problem Checklist</p> |                                                          |                                                                           |                            |                            |               |               |  |  |              |  |              |  |  |  |                            |  |  |                            |                             |  |
